# Supplementary material for: Prevalence and Correlates of Criminal Victimization in Taiwanese Outpatients with Severe Mental Illness
Source: Research Square preprint supplement (doi:10.21203/rs.3.rs-8149581/v1), 2025-12-24
Supplement: Supplementary file 1 [file 42c8d1c2dfa9e45b2812d47a.docx]

**Table 1. Sociodemographic and Clinical Characteristics (N = 798)**

| **Characteristics** | **N, (%)** |
| --- | --- |
| **Gender** |  |
| Male | 276, (34.6%) |
| Female | 522, (65.4%) |
| **Marriage** |  |
| Unmarried | 588, (73.7%) |
| Married | 210, (26.3%) |
| **Work** |  |
| Unemployment | 331, (41.5%) |
| Employment | 346, (43.4%) |
| Household | 60, (7.5%) |
| Student | 22, (2.8%) |
| Retirement | 39, (4.9%) |
| **Low-income household** |  |
| No | 614, (76.9%) |
| Yes | 184, (23.1%) |
| **Living with family** |  |
| Without | 180, (22.6%) |
| With | 618, (77.4%) |
| **Disability Certificate** |  |
| No | 381, (47.7%) |
| Yes | 417, (52.3%) |
| **Certificate of Major Psychiatric Illness issued under Taiwan's National Health Insurance** | |
| No | 307, (38.5%) |
| Yes | 491, (61.5%) |
| **Psychiatric Hospitalization History** |  |
| Without | 350, (43.9%) |
| With | 448, (56.1%) |
| **Day Hospital History** |  |
| Without | 614, (76.9%) |
| With | 184, (23.1%) |
| **History of Suicide** |  |
| No | 411, (51.5%) |
| Yes | 387, (48.5%) |
| **History of Violence** |  |
| No | 566, (70.9%) |
| Yes | 232, (29.1%) |
| **History of Long-acting injection** |  |
| No | 436, (56.4%) |
| Yes | 362, (45.4%) |
| **Physical illness** |  |
| No | 599, (75.1%) |
| Yes | 199, (24.9%) |
| **Smoking** |  |
| No | 494, (61.9%) |
| Yes | 304, (38.1%) |
| **Harmful drinking (Drinking > 3 times/week)** |  |
| No | 767, (96.1%) |
| Yes | 31, (3.9%) |
| **History of legal problem** |  |
| No | 700, (87.7%) |
| Yes | 98, (12.3%) |
| **Diagnosis** |  |
| Schizophrenia | 318, (39.8%) |
| Bipolar disorder | 480, (60.2%) |
| **Education** |  |
| Elementary School | 67, (8.4%) |
| Middle School | 107, (13.4%) |
| High School | 297, (37.2%) |
| Undergraduate | 294, (36.8%) |
| Graduate School | 33, (4.1%) |
| **Age** | 43.35±11.27 years old |
| **Duration of severe mental illness** | 9.98±5.58 years |
| **PHQ9a** | 10.92±7.70 |
| **DSb** | 47.02±19.67 |
| **MARSc** | 6.06±2.36 |
| **PSPd** | 68.16±12.37 |
| **Victimization** |  |
| No | 598, (74.9%) |
| Yes | 200, (25.1%) |
| **Non-violent victimization** |  |
| No | 654, (82.0%) |
| Yes | 144, (18.0%) |
| **Violent victimization** |  |
| No | 671, (84.1%) |
| Yes | 127, (15.9%) |

a. Patient Health Questionnaire, b. Demoralization Scale, c. Medication Adherence Rating Scale, d. Personal and Social Performance scale
