# Supplementary material for: Prevalence and Correlates of Criminal Victimization in Taiwanese Outpatients with Severe Mental Illness
Source: Research Square preprint supplement (doi:10.21203/rs.3.rs-8149581/v1), 2025-12-24
Supplement: Supplementary file 2 [file 94370a5deec89f5e933f7c5c.docx]

Table 2. Comparison of Sociodemographic and Clinical Characteristics by Victimization Status (N = 798)

| **Characteristics** | **Not Victimized 74.9%（N:598）** | **Victimized**  **25.1%（N:200）** | **Statistics** | **P** |
| --- | --- | --- | --- | --- |
| **Gender** |  |  | χ2=0.514 | .474 |
| Male | 76.4%, 211 | 23.6%, 65 |  |  |
| Female | 74.1%, 387 | 25.9%, 135 |  |  |
| **Marriage** |  |  | χ2=8.408 | .004＊ |
| Unmarried | 72.3%,425 | 27.7%,163 |  |  |
| Married | 82.4%,173 | 17.6%,37 |  |  |
| **Work** |  |  | χ2=5.531 | .237 |
| Unemployment | 71.6%,237 | 28.4%,94 |  |  |
| Employment | 75.7%,262 | 24.3%,84 |  |  |
| Household | 81.7%,49 | 18.3%,11 |  |  |
| Student | 77.3%,17 | 22.7%,5 |  |  |
| Retirement | 84.6%,33 | 15.4%,6 |  |  |
| **Low-income household** |  |  | χ2=10.722 | .001＊ |
| No | 77.7%,477 | 22.3%,137 |  |  |
| Yes | 65.8%,121 | 34.2%,63 |  |  |
| **Living with family** |  |  | χ2=20.008 | .000＊ |
| Without | 62.2%,112 | 37.8%,68 |  |  |
| With | 78.6%,486 | 21.4%,132 |  |  |
| **Disability Certificate** |  |  | χ2=13.525 | .000＊ |
| No | 80.8%,308 | 19.2%,73 |  |  |
| Yes | 69.5%,290 | 30.5%,127 |  |  |
| **Major psychiatric Illness certification** |  |  | χ2=0.689 | .407 |
| No | 76.5%,235 | 23.5%,72 |  |  |
| Yes | 73.9%,363 | 26.1%,128 |  |  |
| **Psychiatric Hospitalization History** |  |  | χ2=12.783 | .000＊ |
| Without | 81.14%,284 | 18.86%,66 |  |  |
| With | 70.09%,314 | 29.91%,134 |  |  |
| **Day Hospital History** |  |  | χ2=1.783 | .182 |
| Without 76.9%,614 | 76.1%,467 | 23.9%,147 |  |  |
| With 23.1%,184 | 71.2%,131 | 28.8%,53 |  |  |
| **History of Suicide** |  |  | χ2=38.589 | .000＊ |
| No | 84.2%,346 | 15.8%,65 |  |  |
| Yes | 65.1%,252 | 34.9%,135 |  |  |
| **History of Violence** |  |  | χ2=20.217 | .000 |
| No | 79.3%,449 | 20.7%,117 |  |  |
| Yes | 64.2%,149 | 35.8%,83 |  |  |
| **History of Long-acting injection** |  |  | χ2=.288 | .591 |
| No | 75.7%,330 | 24.3%,106 |  |  |
| Yes | 74.0%,268 | 26.0%,94 |  |  |
| **Physical illness** |  |  | χ2=.936 | .333 |
| No | 75.8%,454 | 24.2%,145 |  |  |
| Yes | 72.4%,144 | 27.6%,55 |  |  |
| **Smoking** |  |  | χ2=28.628 | .000＊ |
| No | 81.4%,402 | 18.6%,92 |  |  |
| Yes | 64.5%,196 | 35.5%,108 |  |  |
| **Heavy Drinking** |  |  | χ2=6.937 | .008＊ |
| No | 75.7%,581 | 24.3%,186 |  |  |
| Yes | 54.8%,17 | 45.2%,14 |  |  |
| **History of legal problem** |  |  | χ2=25.874 | .000＊ |
| No | 77.9%,545 | 22.1%,155 |  |  |
| Yes | 54.1%,53 | 45.9%,45 |  |  |
| **Diagnosis** |  |  | χ2=.003 | .960 |
| Schizophrenia | 74.8%,238 | 25.2%,80 |  |  |
| Bipolar disorder | 75.0%,360 | 25%,120 |  |  |
| **Education** |  |  | χ2=1.778 | .776 |
| Elementary School | 70.1%,47 | 29.9%,20 |  |  |
| Middle School | 75.7%,81 | 24.3%,26 |  |  |
| High School | 74.4%,221 | 25.6%,76 |  |  |
| Undergraduate | 75.5%,222 | 24.5%,72 |  |  |
| Graduate School | 81.8%,27 | 18.2%,6 |  |  |
| **Age** | 43.5y/o±11.67 | 42.9y/o±10.84 | t=0.65 | .516 |
| **Duration of severe mental illness** | 9.90±5.47 | 10.19yrs±5.90 | t=-0.63 | .529 |
| **PHQ9a** | 9.96±7.50 | 13.80±7.57 | t=-6.20 | .000＊ |
| **DSb** | 44.72±19.71 | 53.91±17.98 | t=-6.10 | .000＊ |
| **MARSc** | 6.24±2.35 | 5.51±2.32 | t=3.87 | .000＊ |
| **PSPd** | 69.03±12.25 | 65.58±12.41 | t=3.42 | .001＊ |

a. Patient Health Questionnaire, b. Demoralization Scale, c. Medication Adherence Rating Scale, d. Personal and Social Performance scale, * <0.05
