# Supplementary material for: Prevalence and Correlates of Criminal Victimization in Taiwanese Outpatients with Severe Mental Illness
Source: Research Square preprint supplement (doi:10.21203/rs.3.rs-8149581/v1), 2025-12-24
Supplement: Supplementary file 3 [file a4f2ab9e4d5573bfbd140a6b.docx]

**Table 3. Logistic Regression Analysis Predicting Victimization**

|  | **B** | **SE** | **p** | **OR** | **95%CI** |
| --- | --- | --- | --- | --- | --- |
| **Living with family** | -.572 | .199 | .004＊ | .564 | .382~.833 |
| **Suicide History** | .659 | .192 | .001＊ | 1.932 | 1.326~2.815 |
| **Smoking** | .527 | .184 | .004＊ | 1.694 | 1.181~2.429 |
| **Legal History** | .533 | .244 | .029＊ | 1.704 | 1.057~2.748 |
| **Bipolar vs. Schizophrenia** | -.415 | .196 | .035＊ | .660 | .449~970 |
| **PHQ9a (per unit)** | .047 | .012 | .000＊ | 1.049 | 1.023~1.074 |
| **Psychiatric Hospitalization History** | .455 | .188 | .015＊ | 1.577 | 1.092~2.277 |

a. Patient Health Questionnaire, *<0.05
